# Supplementary material for: Potential α-Glucosidase Inhibitors from the Deep-Sea Sediment-Derived Fungus Aspergillus insulicola
Source: MDPI journal article supplement (doi:10.3390/md21030157), 2023-02-26

## Supporting Information

### Potential $\alpha$ -Glucosidase Inhibitors from the Deep-Sea Sediment-Derived Fungus *Aspergillus insulicola*

**Weibo Zhao** <sup>1,2,†</sup>, **Yanbo Zeng** <sup>2,3,†</sup>, **Wenjun Chang** <sup>2,3</sup>, **Huiqin Chen** <sup>2</sup>, **Hao Wang** <sup>2</sup>, **Haofu Dai** <sup>2</sup>, and **Fang Lv** <sup>1,\*</sup>

<sup>1</sup> Beijing Key Laboratory for Separation and Analysis in Biomedicine and Pharmaceuticals, School of Life Science, Beijing Institute of Technology, Beijing, 100081, China

<sup>2</sup> Hainan Provincial Key Laboratory for Functional Components Research and Utilization of Marine Bio-resources, Institute of Tropical Bioscience and Biotechnology, Chinese Academy of Tropical Agricultural Sciences & Key Laboratory for Biology and Genetic Resources of Tropical Crops of Hainan Province, Hainan Institute for Tropical Agricultural Resources, Haikou 571101, China

<sup>3</sup> Zhanjiang Experimental Station of Chinese Academy of Tropical Agricultural Sciences, Zhanjiang, 524013, China

\* Correspondence: lvfangbeijing@bit.edu.cn (F.L.)

† These authors contributed equally to this work.

Figure S1.  $^1\text{H}$  NMR (500 MHz,  $\text{DMSO-}d_6$ ) spectrum of compound **1**

Figure S2.  $^{13}\text{C}$  NMR (125 MHz,  $\text{DMSO-}d_6$ ) spectrum of compound **1**

Figure S3. The DEPT spectrum of compound **1** in  $\text{DMSO-}d_6$

Figure S4. The HSQC spectrum of compound **1** in  $\text{DMSO-}d_6$

Figure S5. The HMBC spectrum of compound **1** in  $\text{DMSO-}d_6$

Figure S6. The COSY spectrum of compound **1** in  $\text{DMSO-}d_6$

Figure S7. The NOESY spectrum of compound **1** in  $\text{DMSO-}d_6$

Figure S8. The HRESIMS spectrum of compound **1**

Figure S9. The UV spectrum of compound **1**

Figure S10. The IR spectrum of compound **1**

Figure S11.  $^1\text{H}$  NMR (500 MHz,  $\text{DMSO-}d_6$ ) spectrum of compound **2**

Figure S12.  $^{13}\text{C}$  NMR (125 MHz,  $\text{DMSO-}d_6$ ) spectrum of compound **2**

Figure S13. The DEPT spectrum of compound **2** in  $\text{DMSO-}d_6$

Figure S14. The HSQC spectrum of compound **2** in  $\text{DMSO-}d_6$

Figure S15. The HMBC spectrum of compound **2** in  $\text{DMSO-}d_6$

Figure S16. The COSY spectrum of compound **2** in  $\text{DMSO-}d_6$

Figure S17. The ROESY spectrum of compound **2** in  $\text{DMSO-}d_6$

Figure S18. The HRESIMS spectrum of compound **2**

Figure S19. The UV spectrum of compound **2**

Figure S20. The IR spectrum of compound **2**

Figure S21.  $^1\text{H}$  NMR (600 MHz,  $\text{DMSO-}d_6$ ) spectrum of compound **3**

Figure S22.  $^{13}\text{C}$  NMR (150 MHz,  $\text{DMSO-}d_6$ ) spectrum of compound **3**

Figure S23. The DEPT spectrum of compound **3** in  $\text{DMSO-}d_6$

Figure S24. The HSQC spectrum of compound **3** in  $\text{DMSO-}d_6$

Figure S25. The HMBC spectrum of compound **3** in  $\text{DMSO-}d_6$

Figure S26. The COSY spectrum of compound **3** in  $\text{DMSO-}d_6$

Figure S27. The ROESY spectrum of compound **3** in  $\text{DMSO-}d_6$

Figure S28. The HRESIMS spectrum of compound **3**

Figure S29. The UV spectrum of compound **3**

Figure S30. The IR spectrum of compound **3**

Figure S1.  $^1\text{H}$  NMR (500 MHz,  $\text{DMSO-}d_6$ ) spectrum of compound **1**

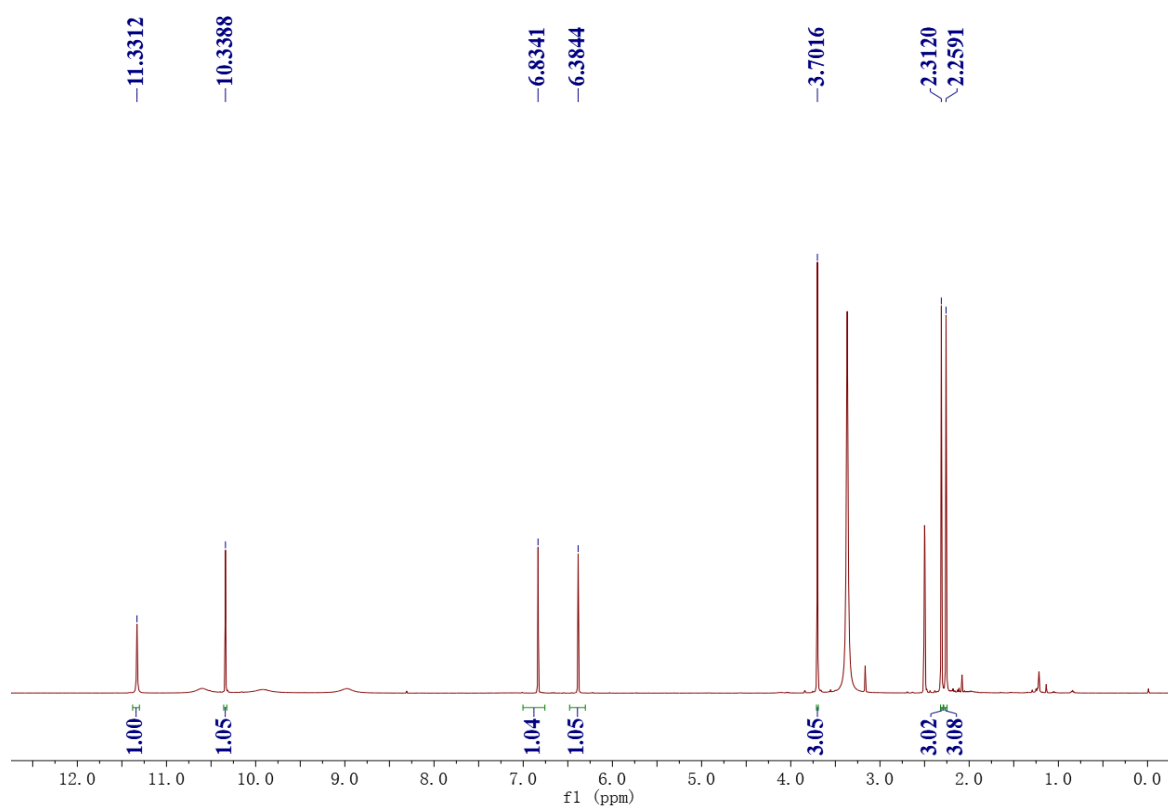

Figure S2.  $^{13}\text{C}$  NMR (125 MHz,  $\text{DMSO-}d_6$ ) spectrum of compound **1**

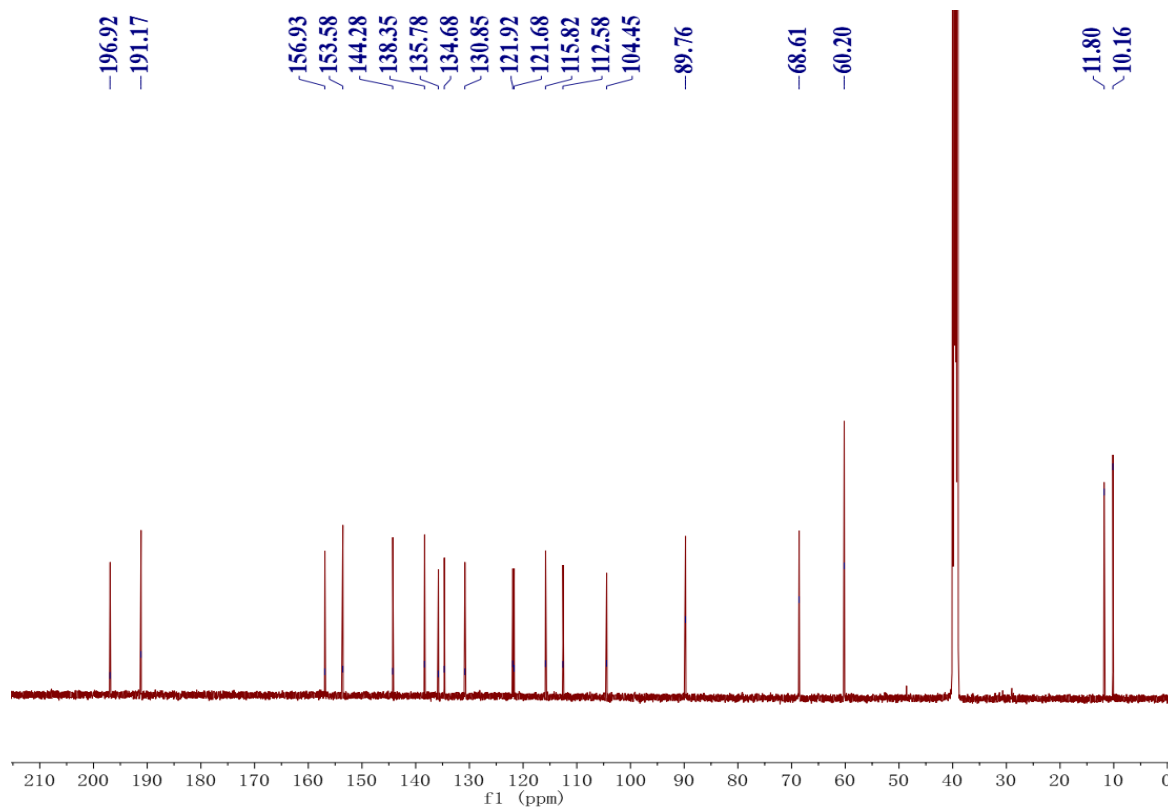

Figure S3. The DEPT spectrum of compound **1** in DMSO- $d_6$

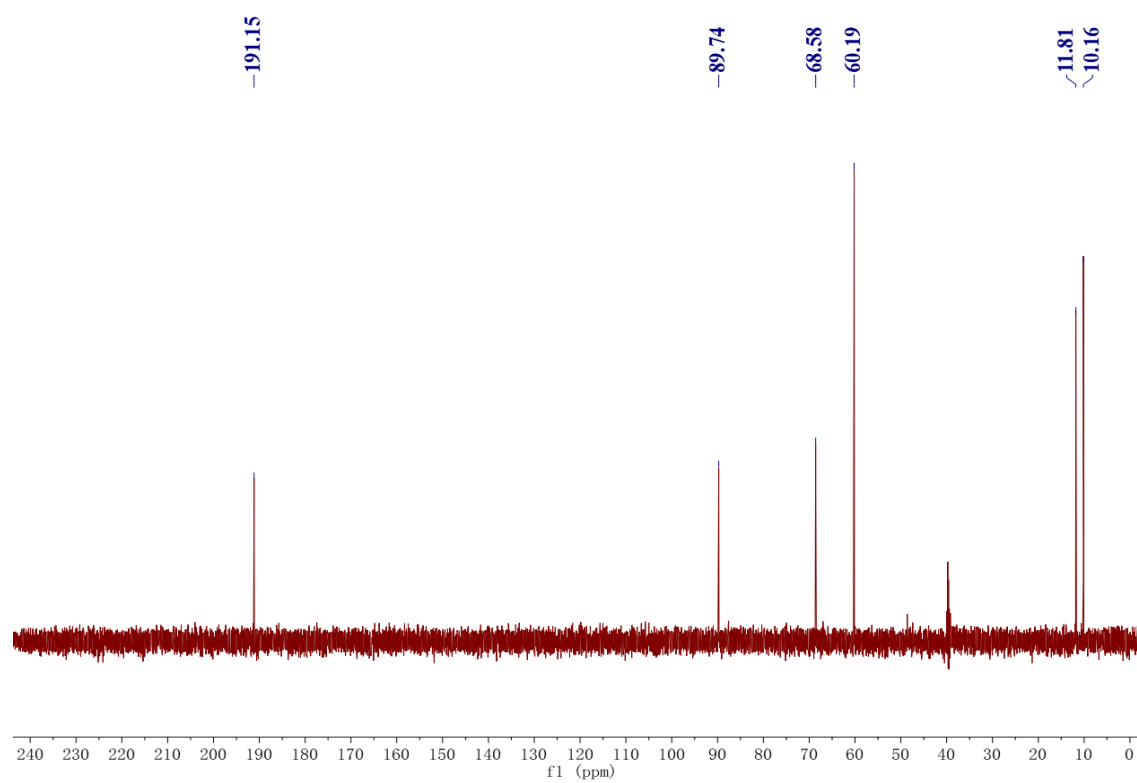

Figure S4. The HSQC spectrum of compound **1** in DMSO- $d_6$

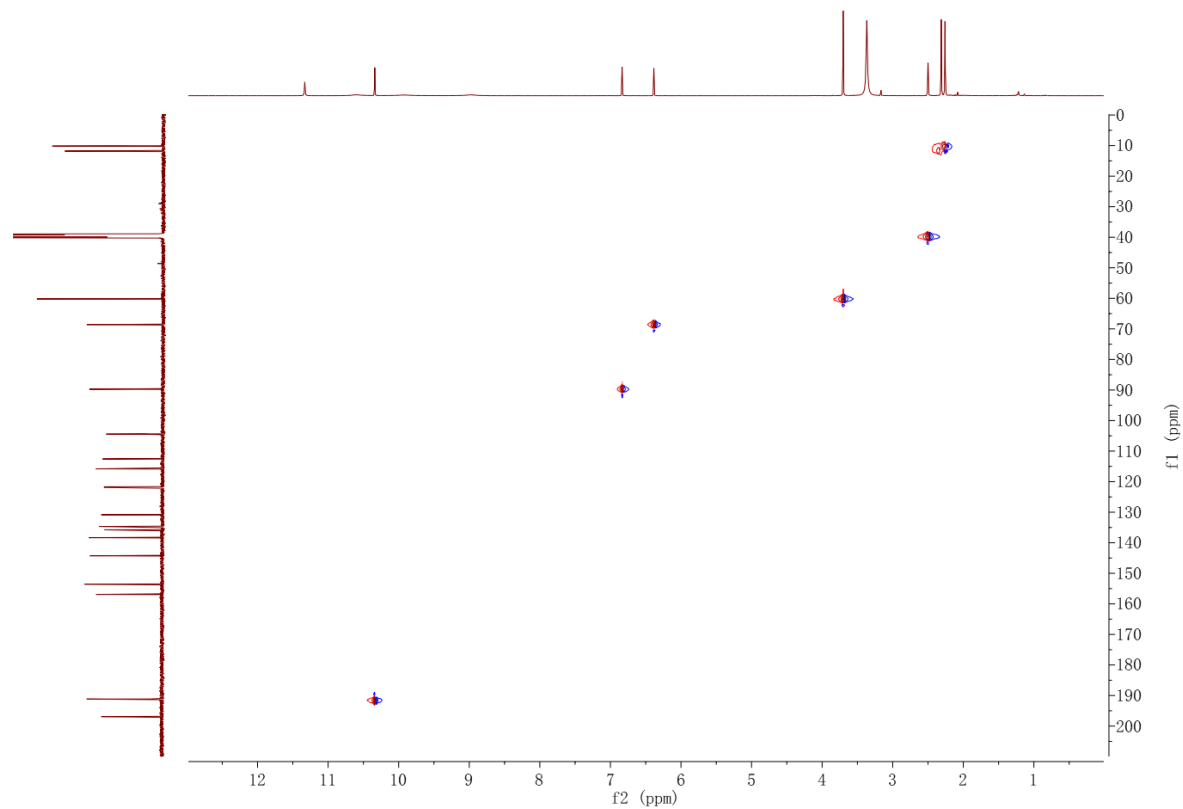

Figure S5. The HMBC spectrum of compound **1** in DMSO- $d_6$

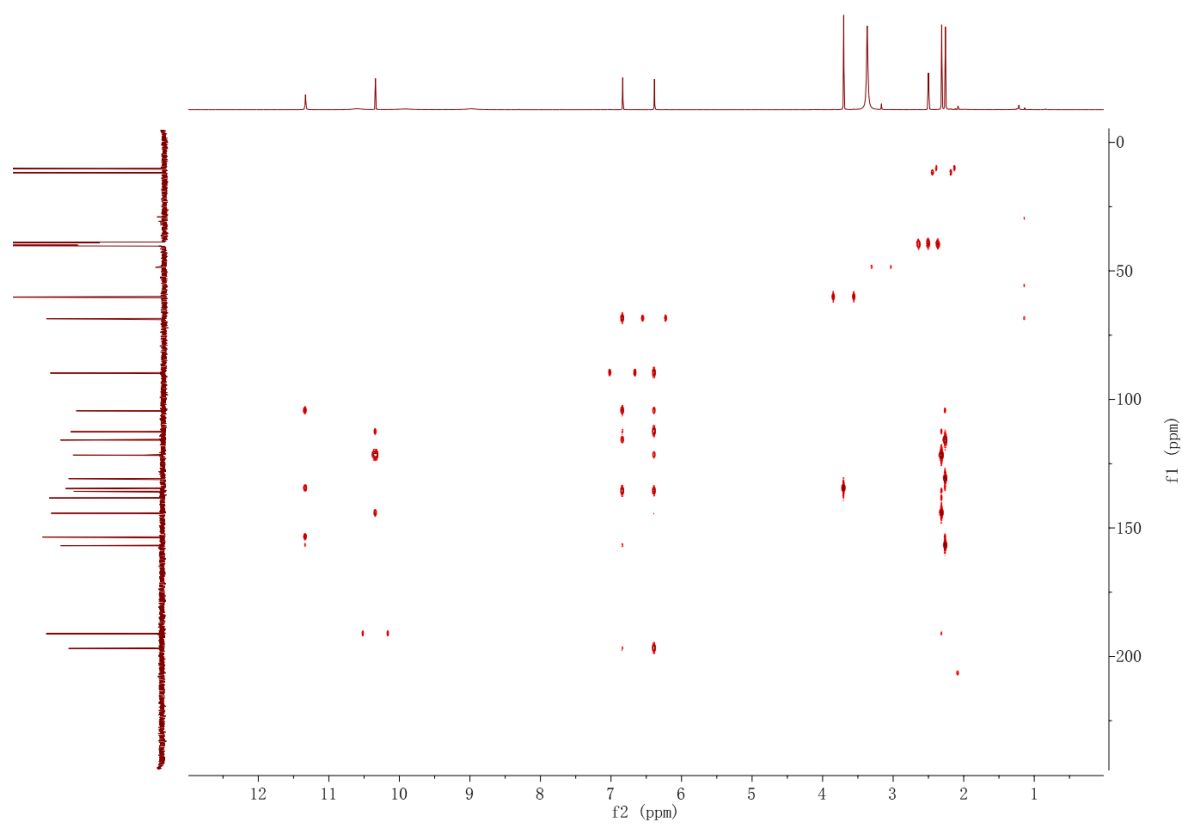

Figure S6. The COSY spectrum of compound **1** in DMSO- $d_6$

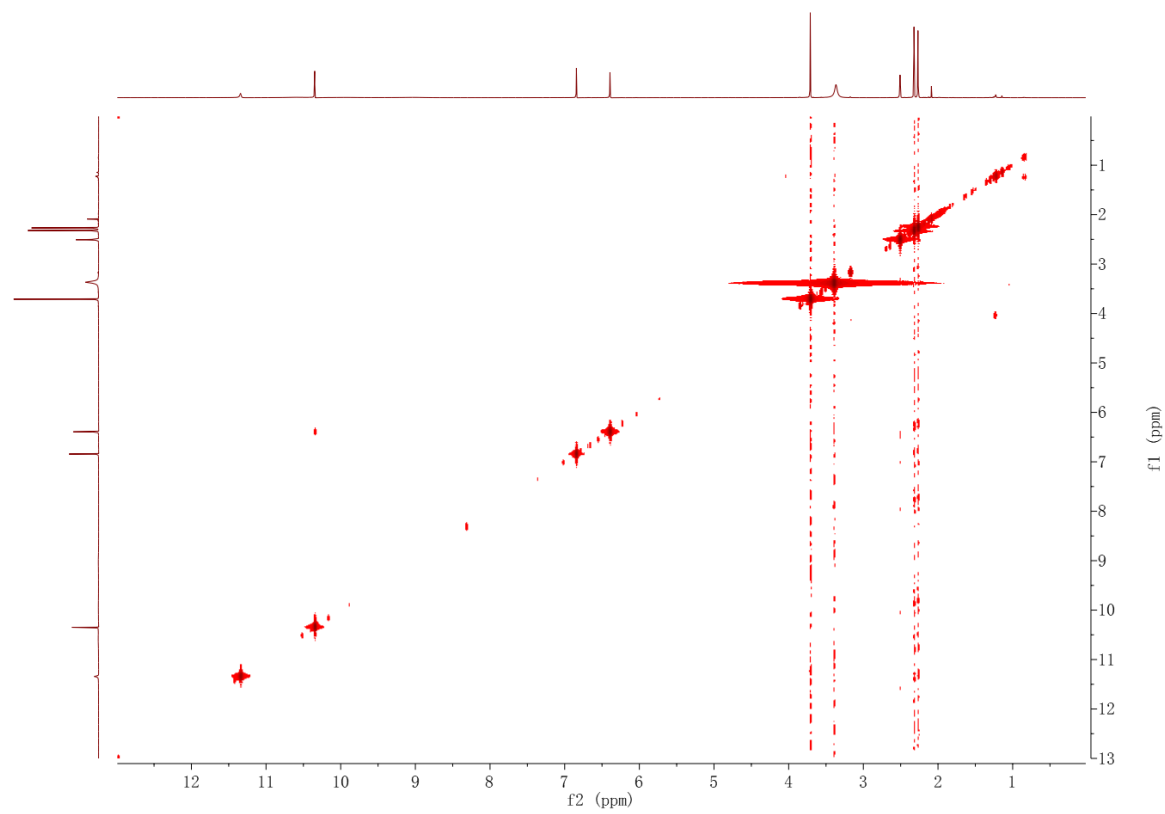

Figure S7. The NOESY spectrum of compound **1** in DMSO-*d*<sub>6</sub>

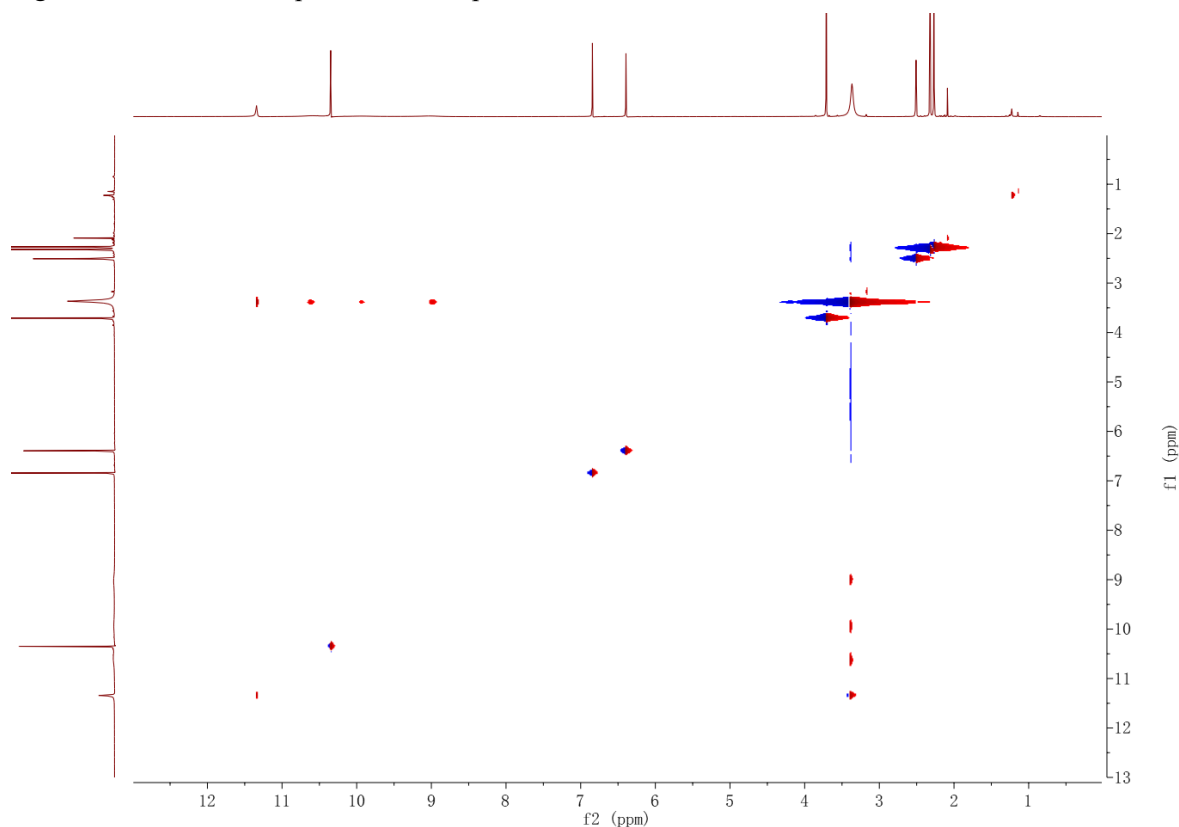

Figure S8. The HRESIMS spectrum of compound **1**

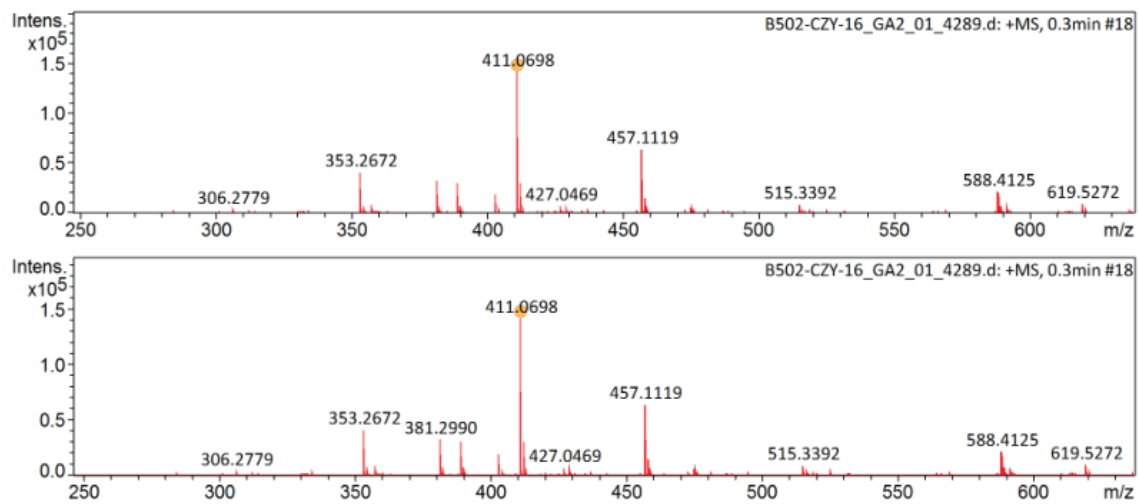

| Meas. m/z | # | Ion Formula                                      | m/z      | err [ppm] | mSigma | # mSigma | Score  | rdb  | e <sup>-</sup> Conf | N-Rule | Adduct |
|-----------|---|--------------------------------------------------|----------|-----------|--------|----------|--------|------|---------------------|--------|--------|
| 411.0698  | 1 | C <sub>19</sub> H <sub>16</sub> NaO <sub>9</sub> | 411.0687 | -2.7      | 4.0    | 1        | 100.00 | 12.0 | even                | ok     | M+Na   |

Figure S9. The UV spectrum of compound **1**

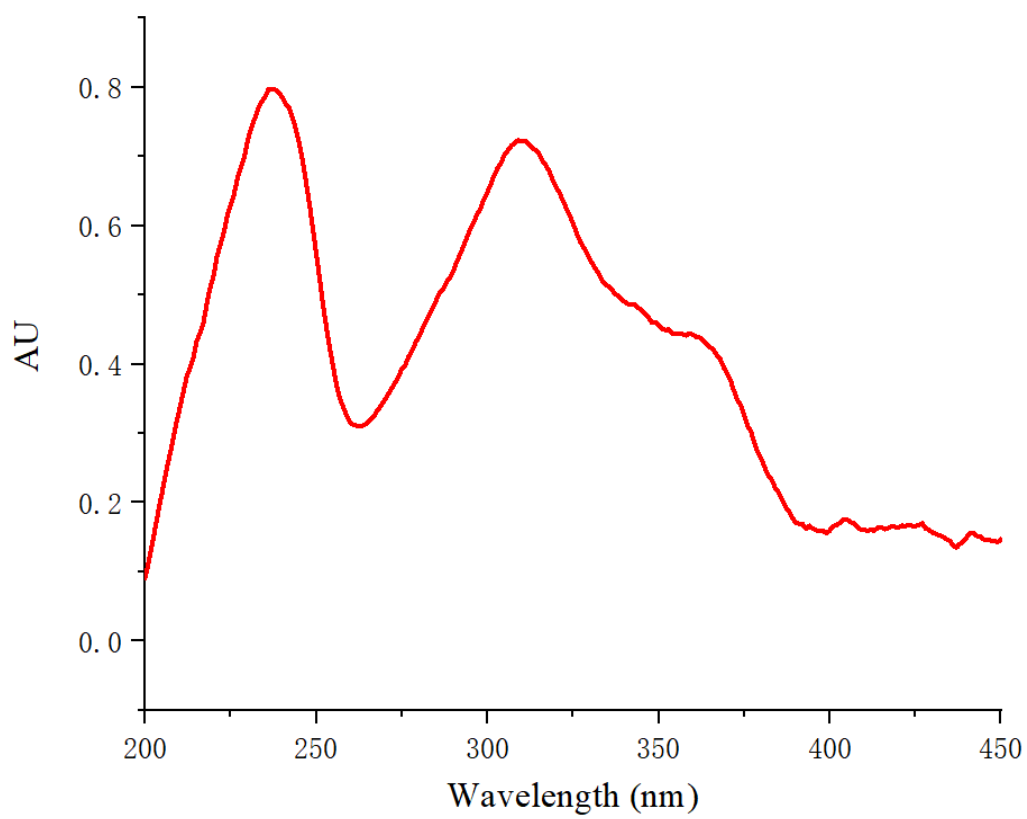

Figure S10. The IR spectrum of compound **1**

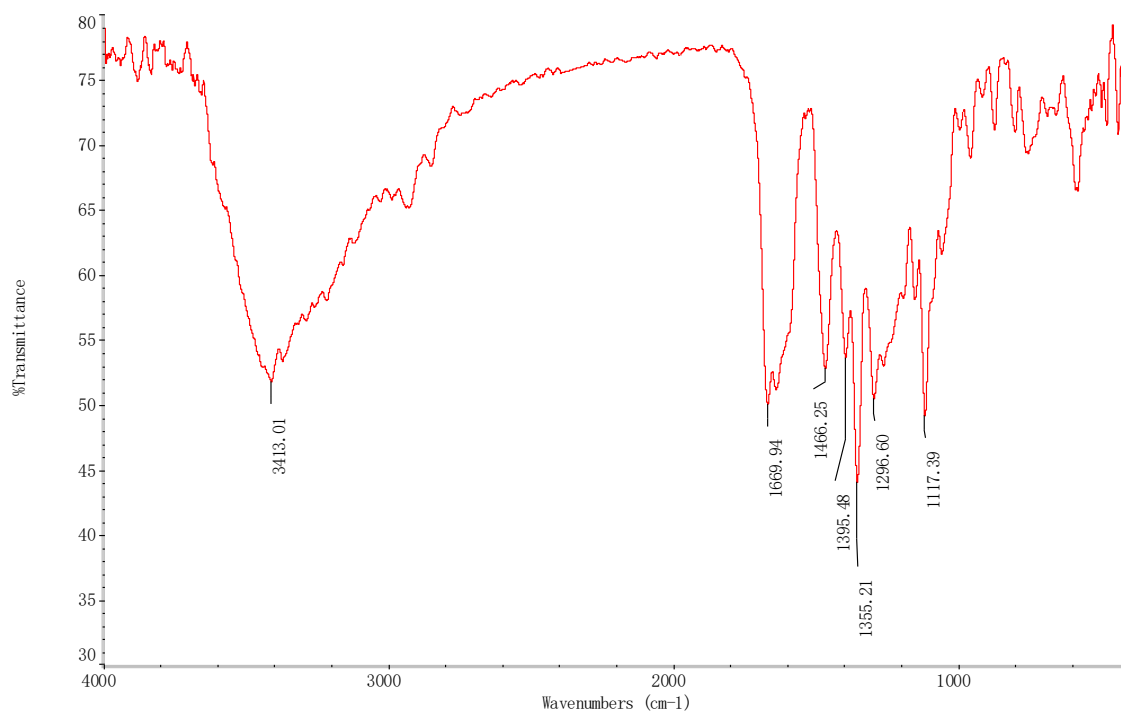

Figure S11.  $^1\text{H}$  NMR (500 MHz,  $\text{DMSO-}d_6$ ) spectrum of compound **2**

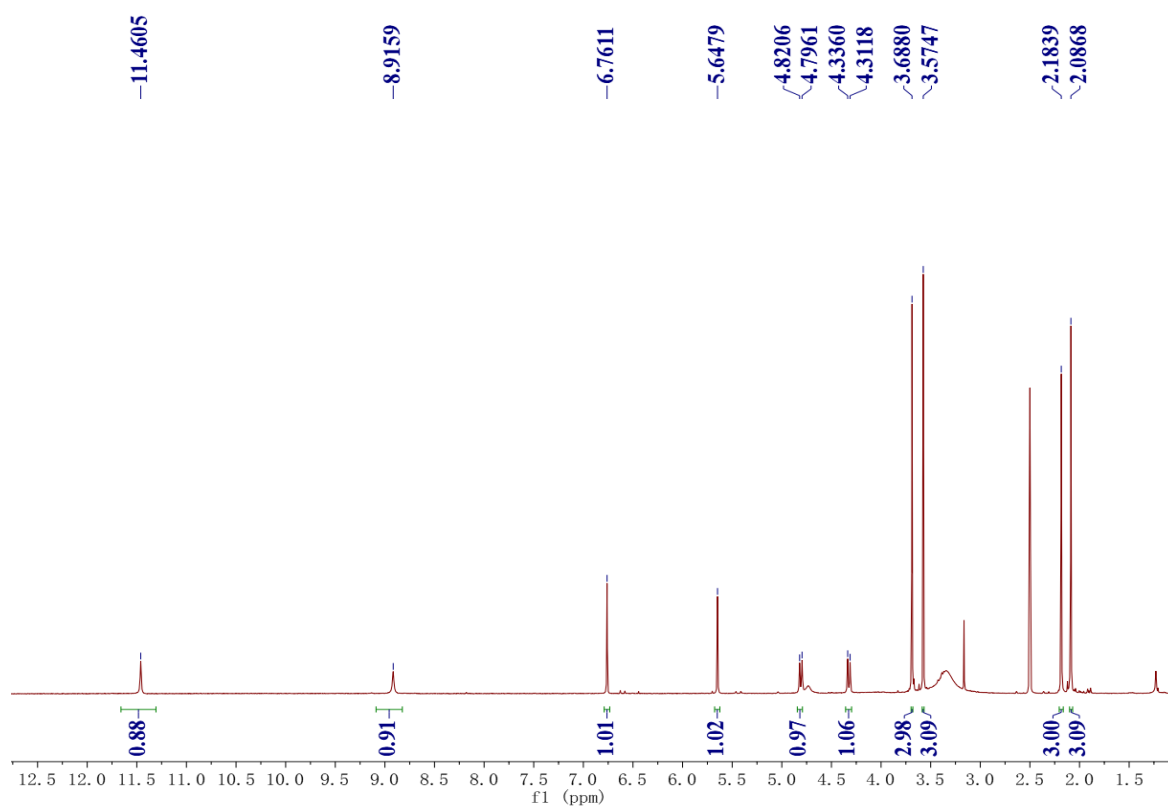

Figure S12.  $^{13}\text{C}$  NMR (125 MHz,  $\text{DMSO-}d_6$ ) spectrum of compound **2**

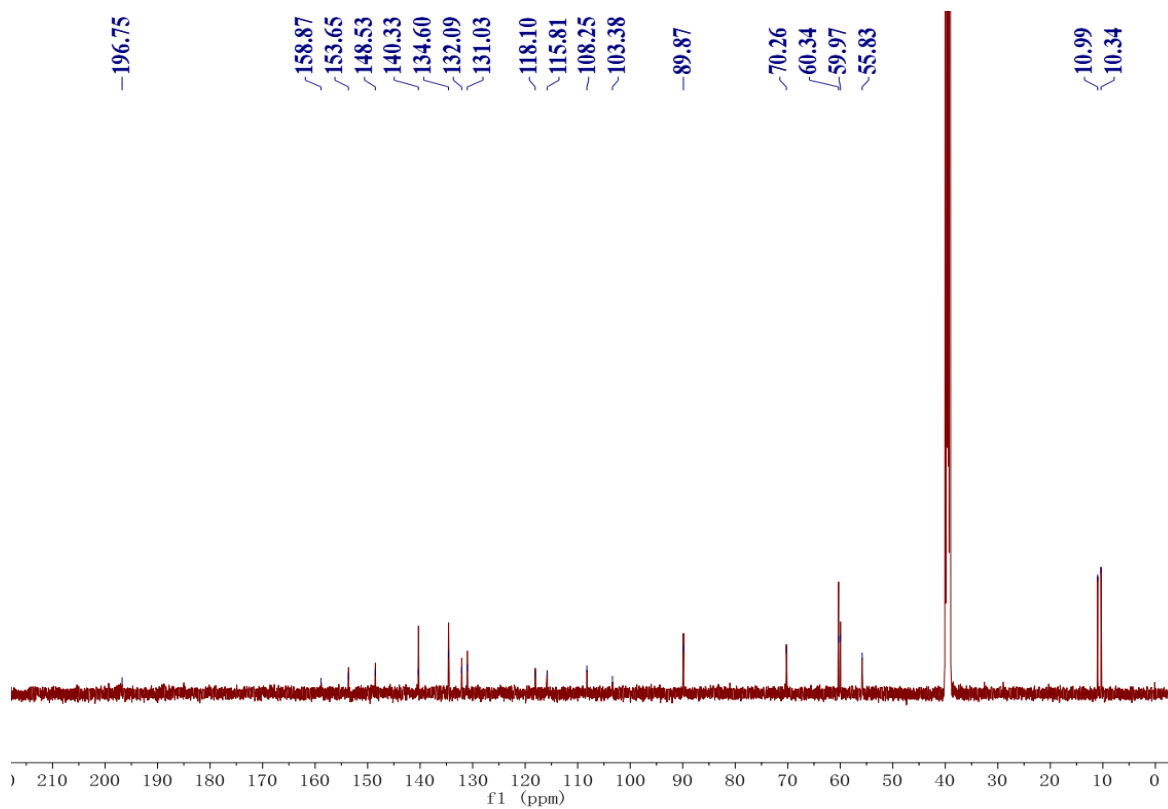



Figure S13. The DEPT spectrum of compound **2** in DMSO- $d_6$

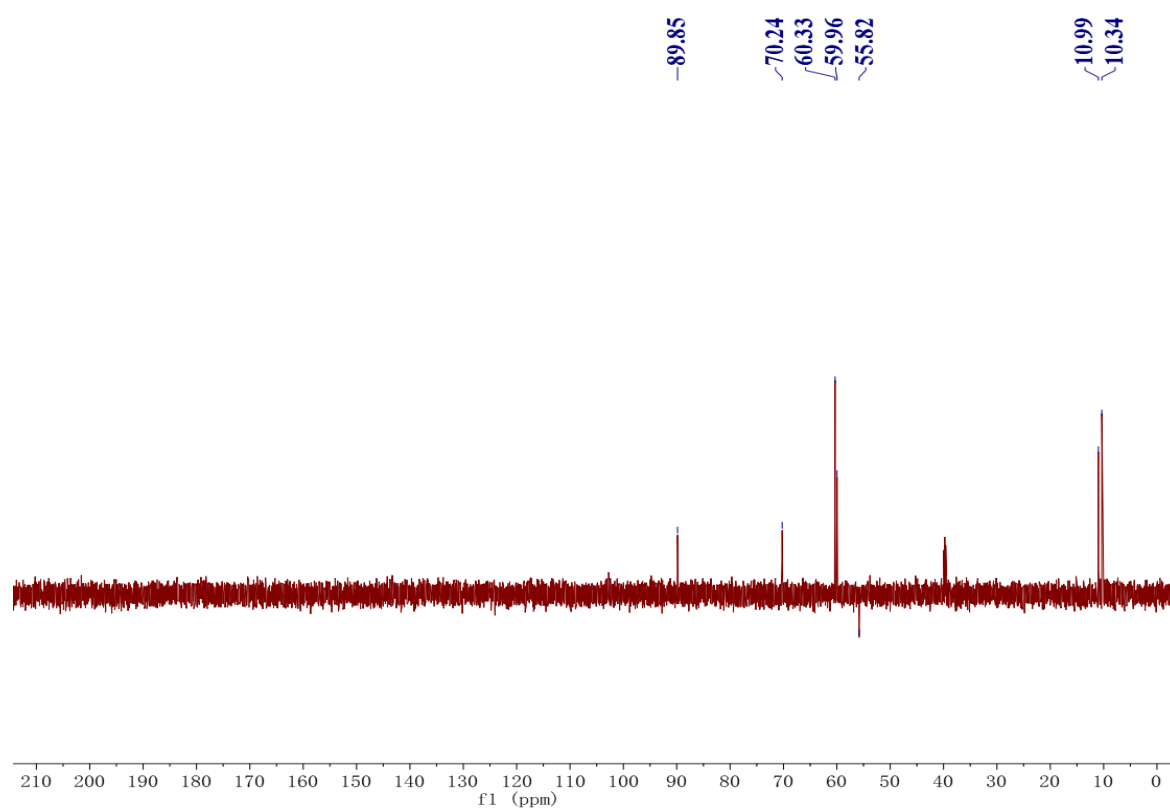

Figure S14. The HSQC spectrum of compound **2** in DMSO- $d_6$

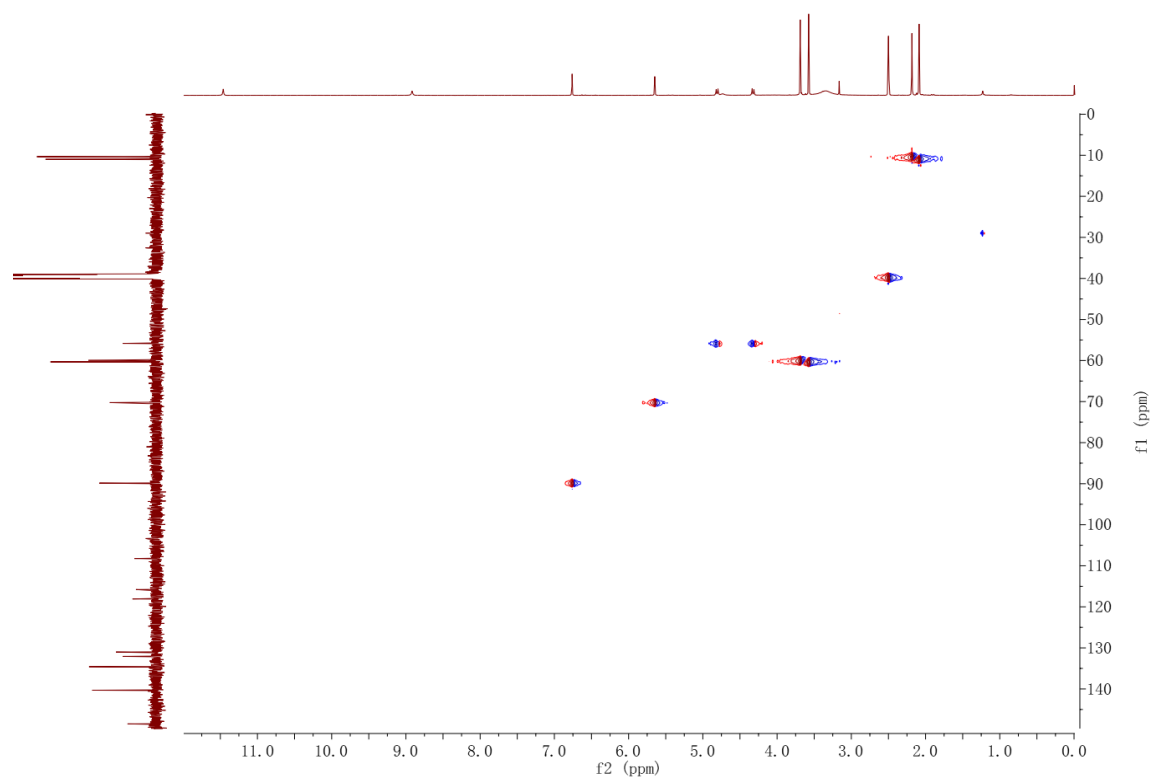

Figure S15. The HMBC spectrum of compound **2** in DMSO- $d_6$

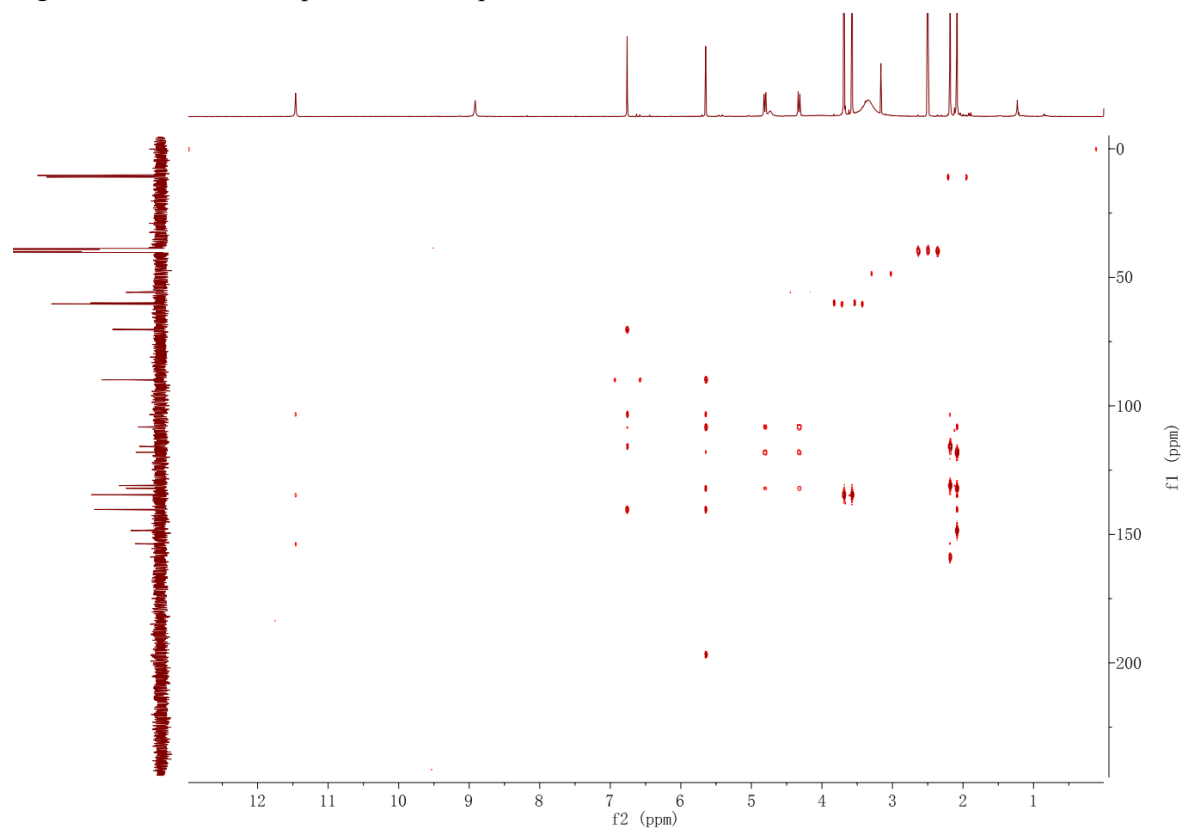

Figure S16. The COSY spectrum of compound **2** in DMSO- $d_6$

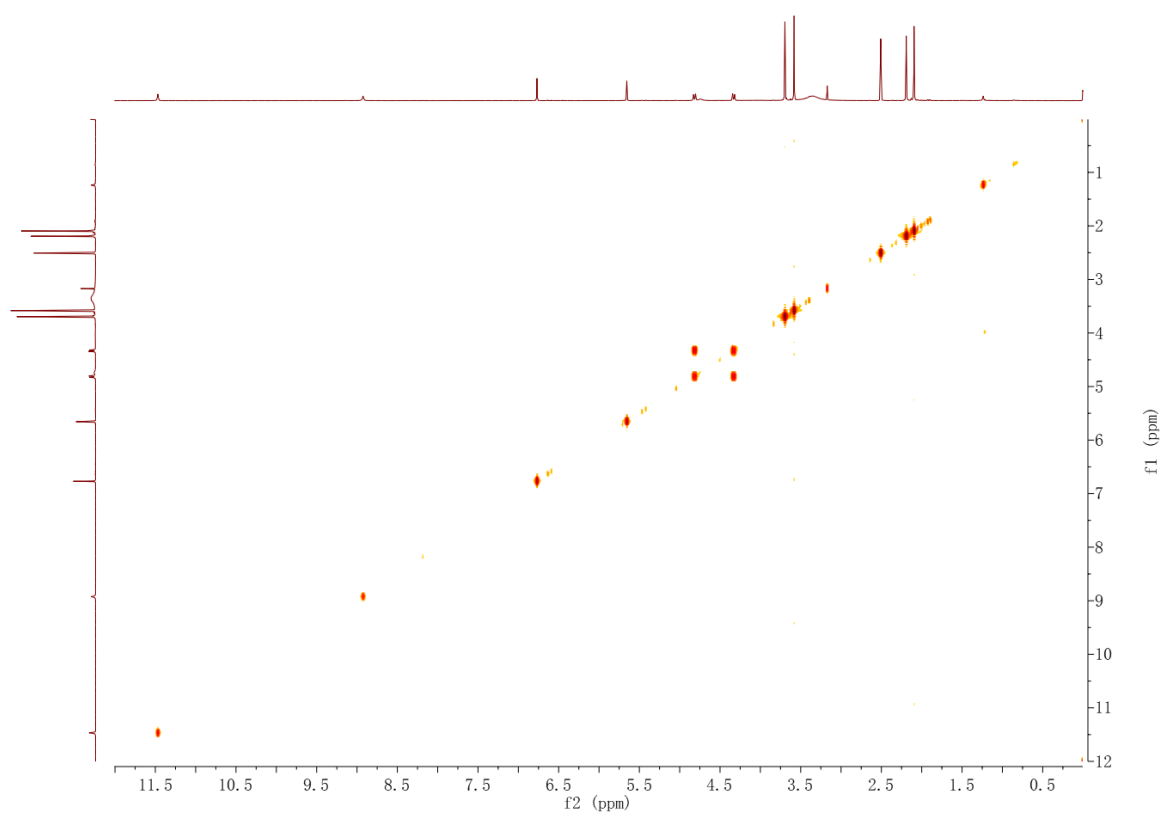

Figure S17. The ROESY spectrum of compound **2** in DMSO-*d*<sub>6</sub>

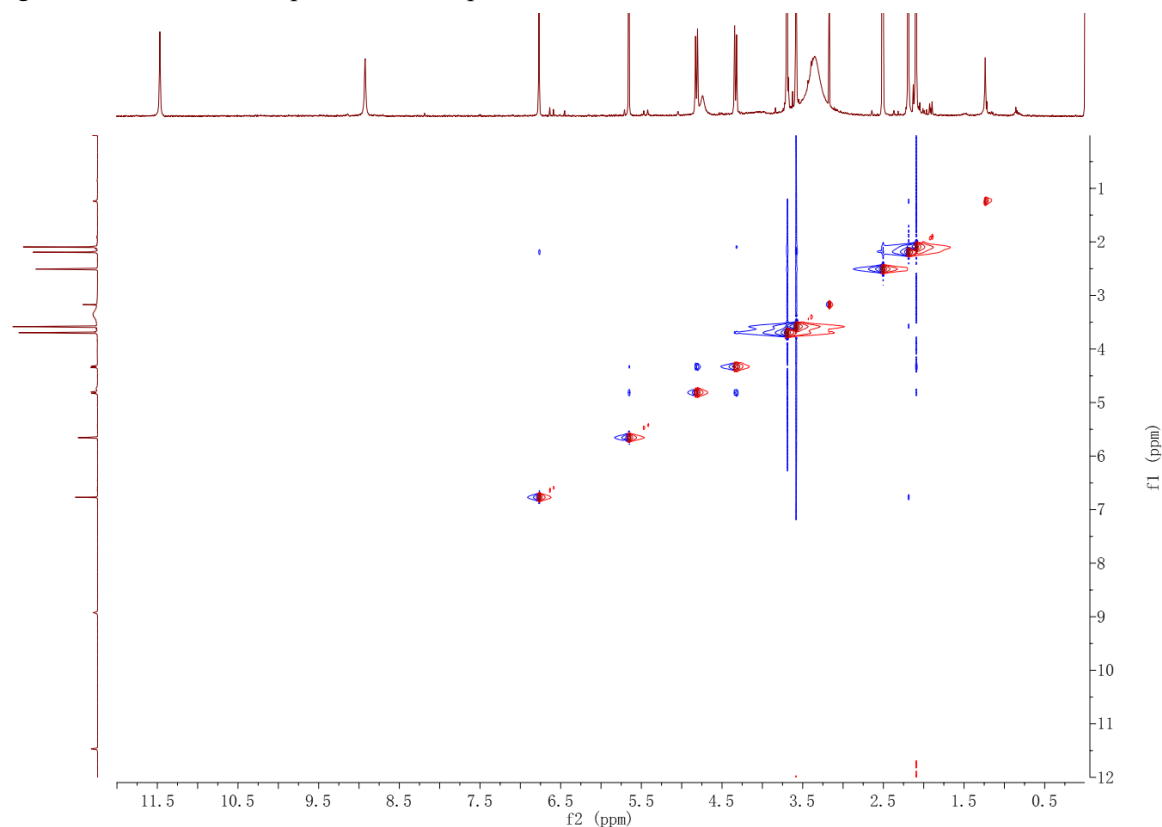

Figure S18. The HRESIMS spectrum of compound **2**

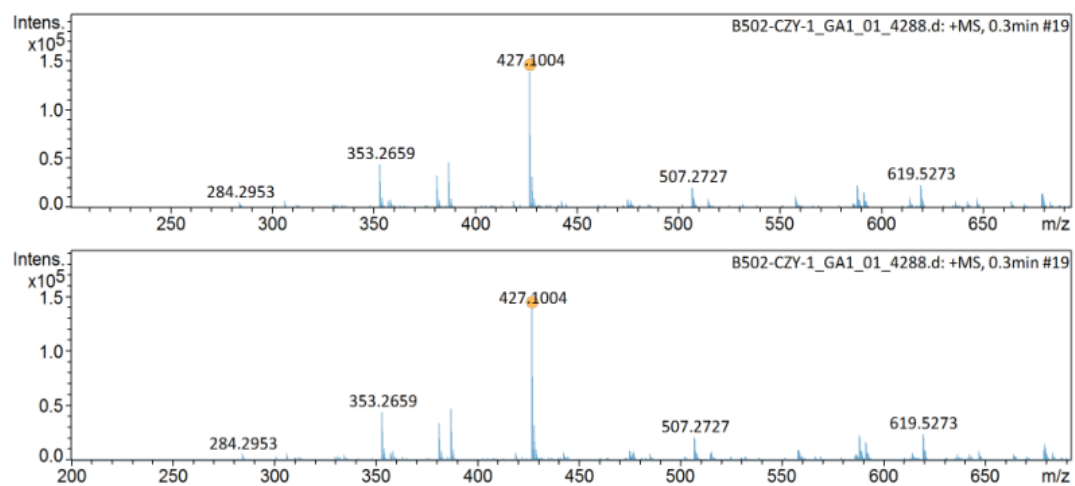

| Meas. m/z | # | Ion Formula                                      | m/z      | err [ppm] | mSigma | # mSigma | Score  | rdb  | e <sup>-</sup> Conf | N-Rule | Adduct |
|-----------|---|--------------------------------------------------|----------|-----------|--------|----------|--------|------|---------------------|--------|--------|
| 427.1004  | 1 | C <sub>20</sub> H <sub>20</sub> NaO <sub>9</sub> | 427.1000 | -1.1      | 24.4   | 1        | 100.00 | 11.0 | even                | ok     | M+Na   |

Figure S19. The UV spectrum of compound **2**

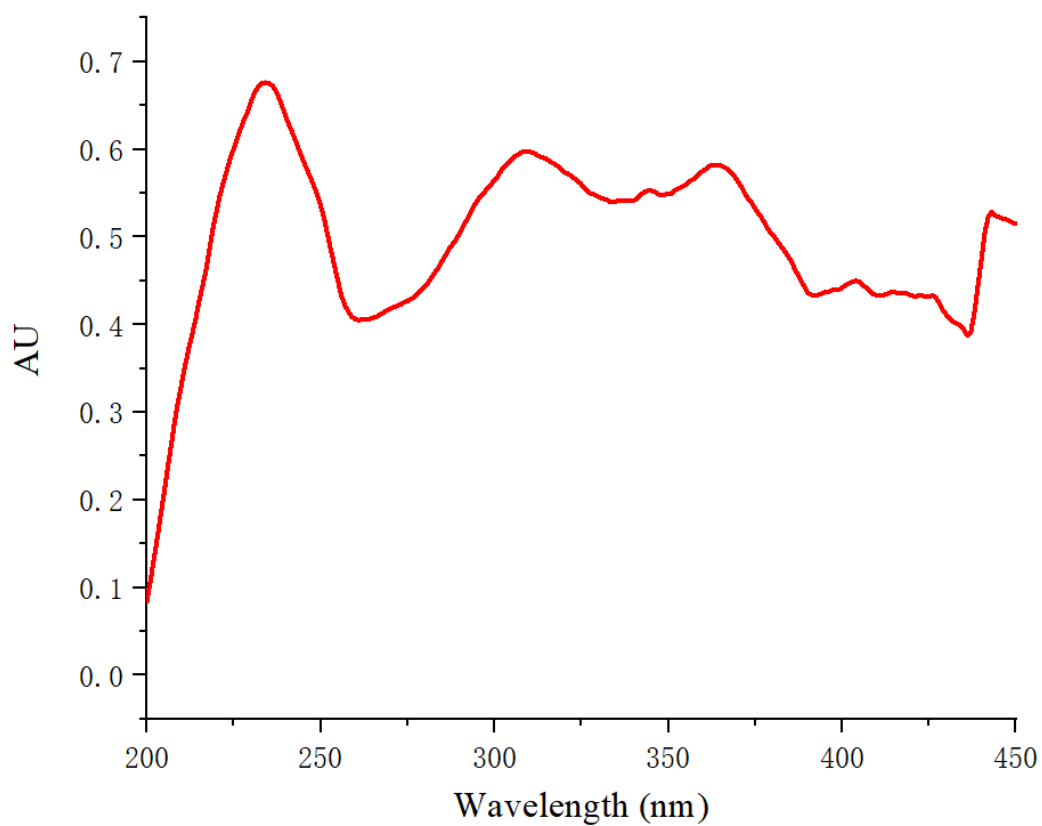

Figure S20. The IR spectrum of compound **2**

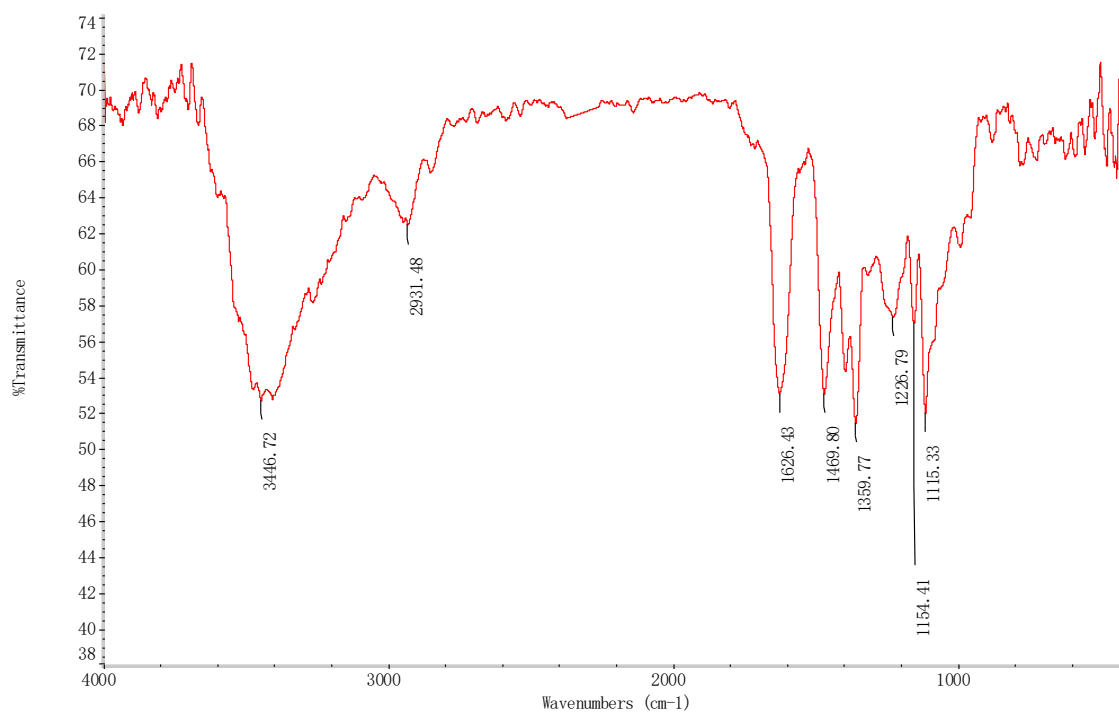

Figure S21.  $^1\text{H}$  NMR (600 MHz,  $\text{DMSO-}d_6$ ) spectrum of compound **3**

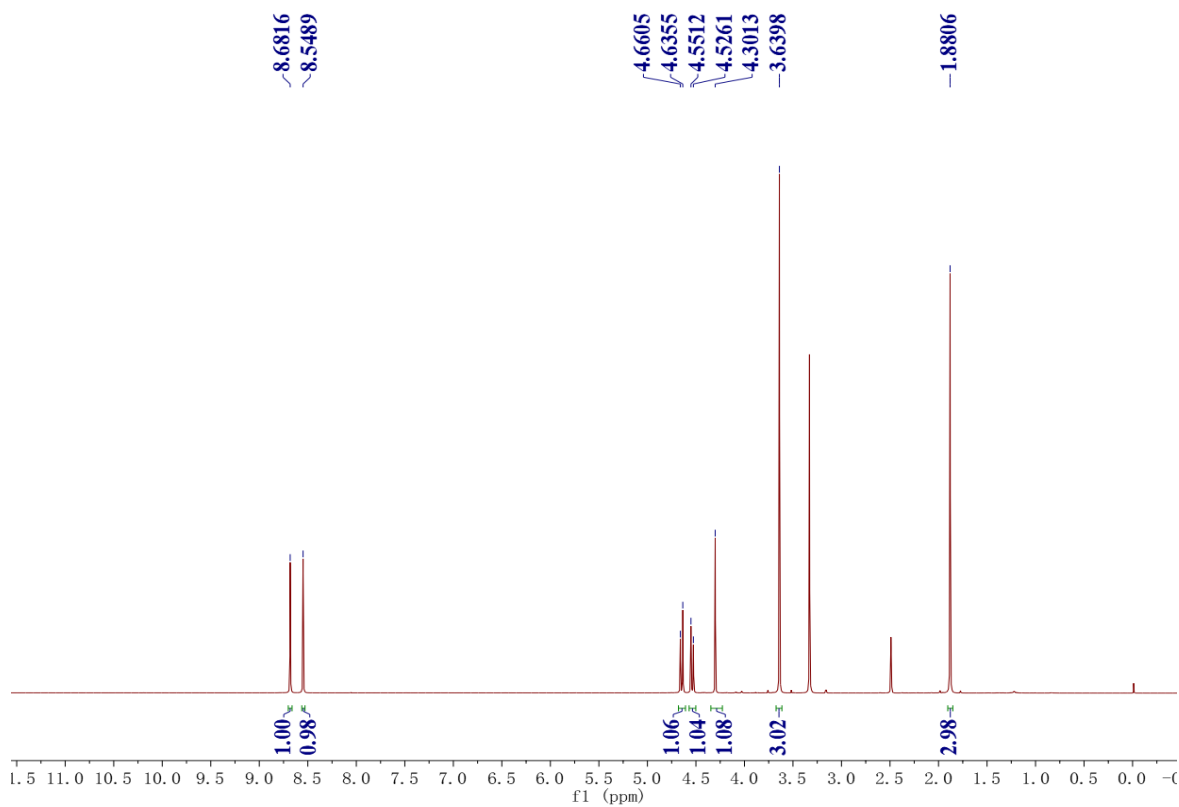

Figure S22.  $^{13}\text{C}$  NMR (150 MHz,  $\text{DMSO-}d_6$ ) spectrum of compound **3**

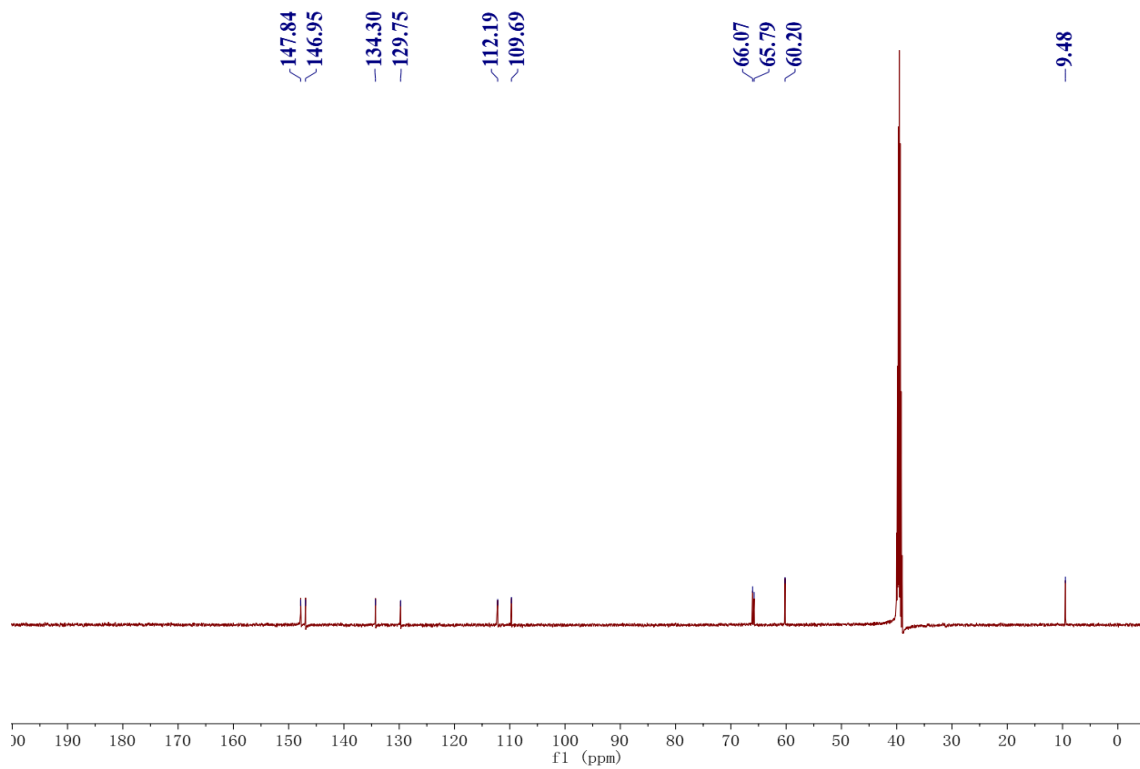

Figure S23. The DEPT spectrum of compound **3** in DMSO- $d_6$

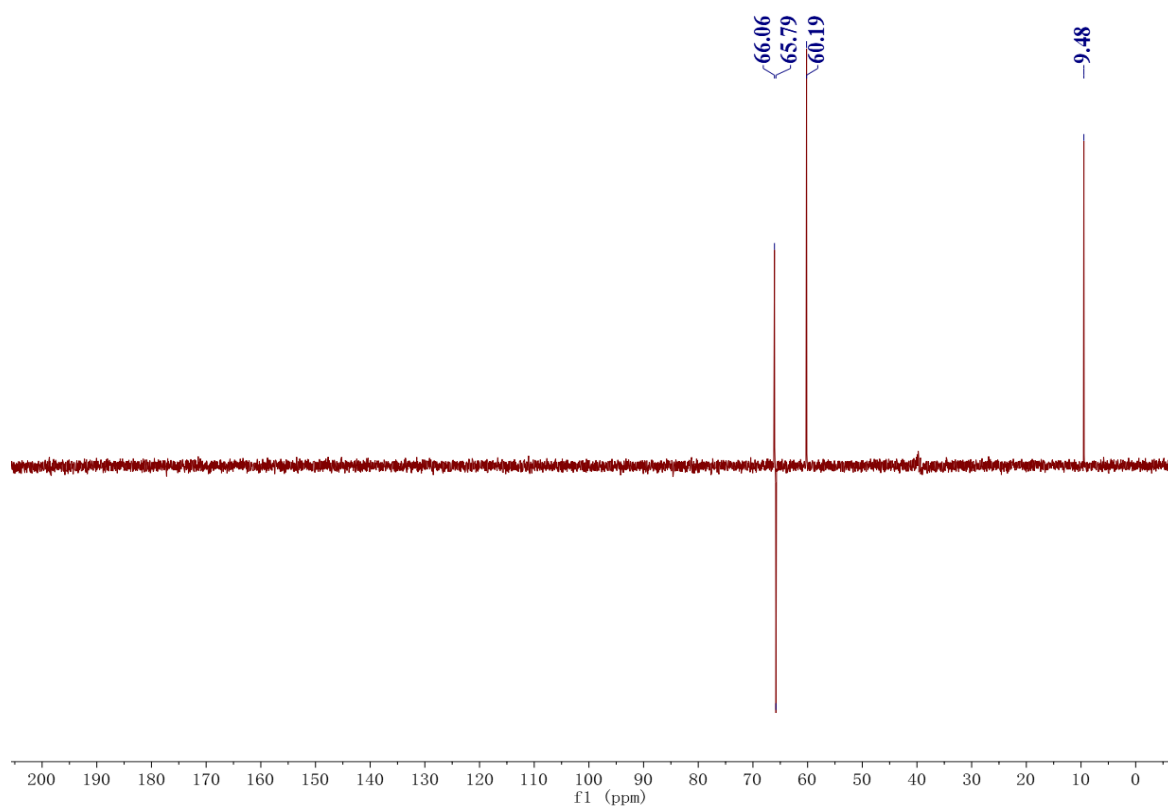

Figure S24. The HSQC spectrum of compound **3** in DMSO- $d_6$

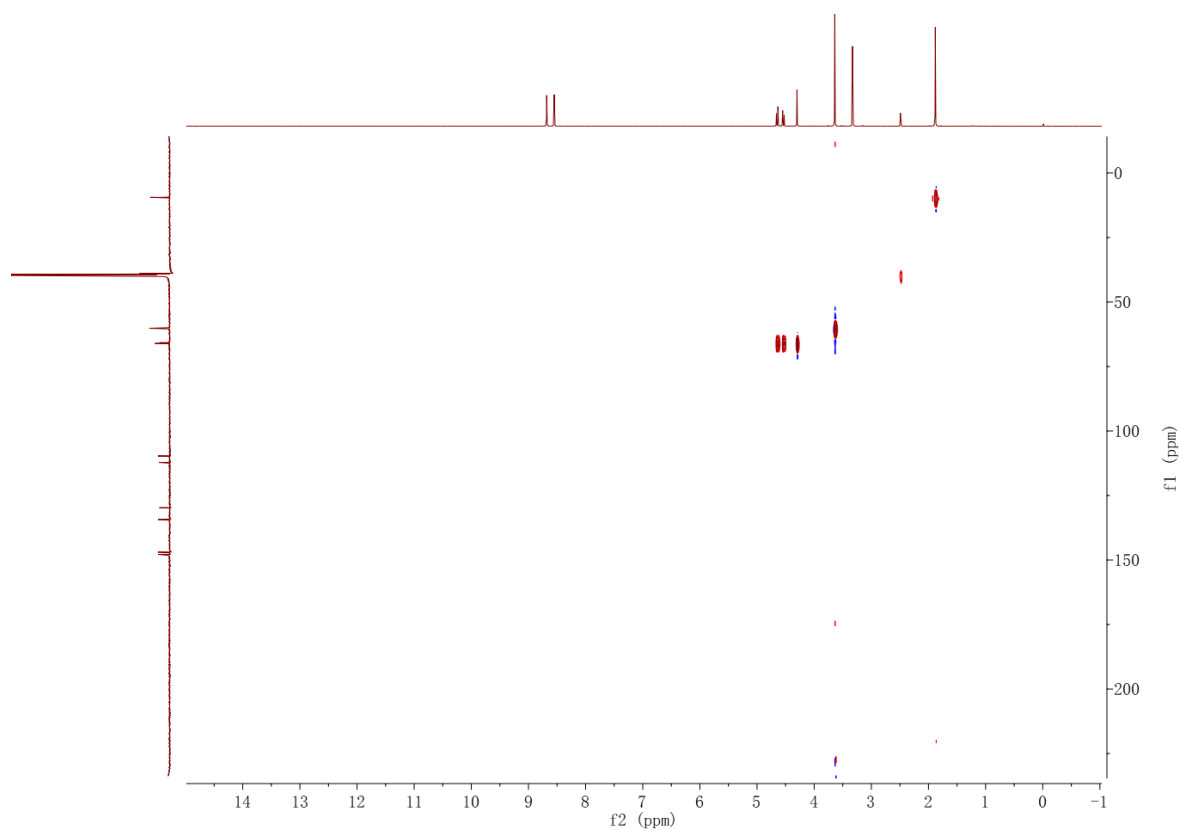

Figure S25. The HMBC spectrum of compound **3** in DMSO- $d_6$

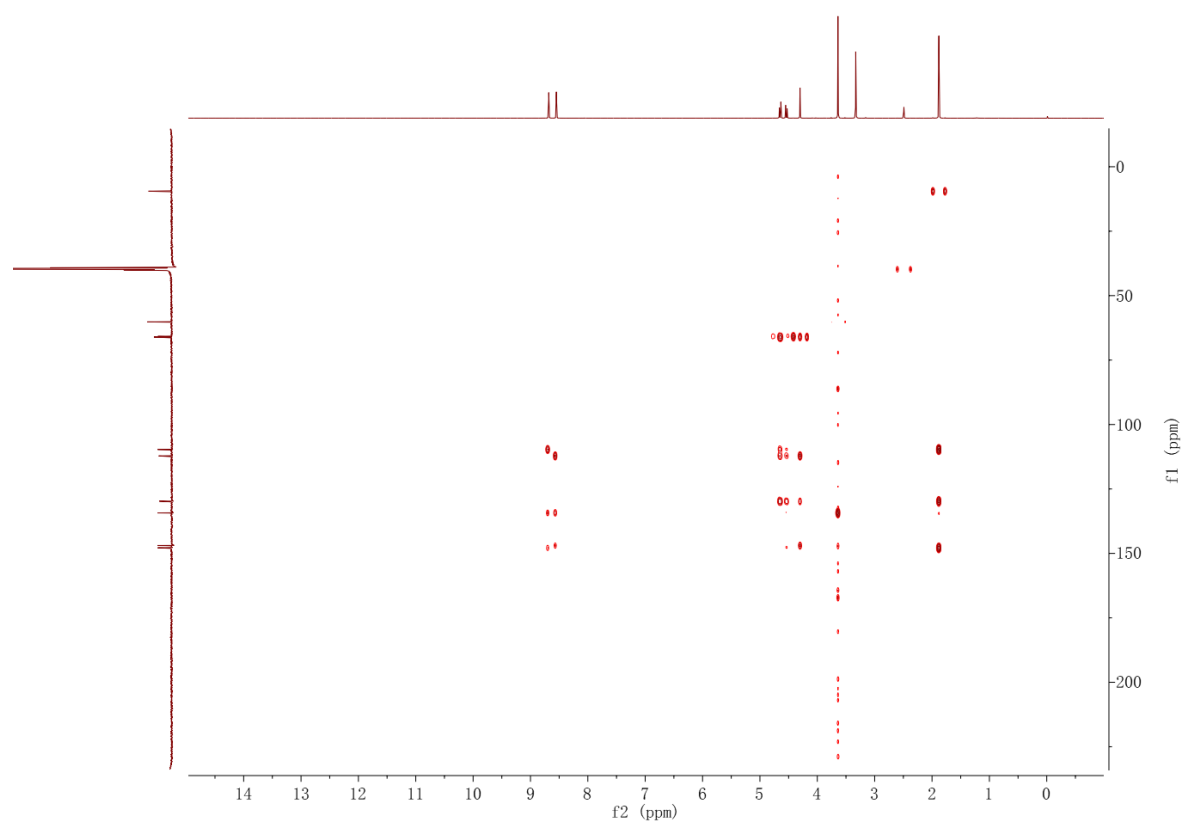

Figure S26. The COSY spectrum of compound **3** in DMSO- $d_6$

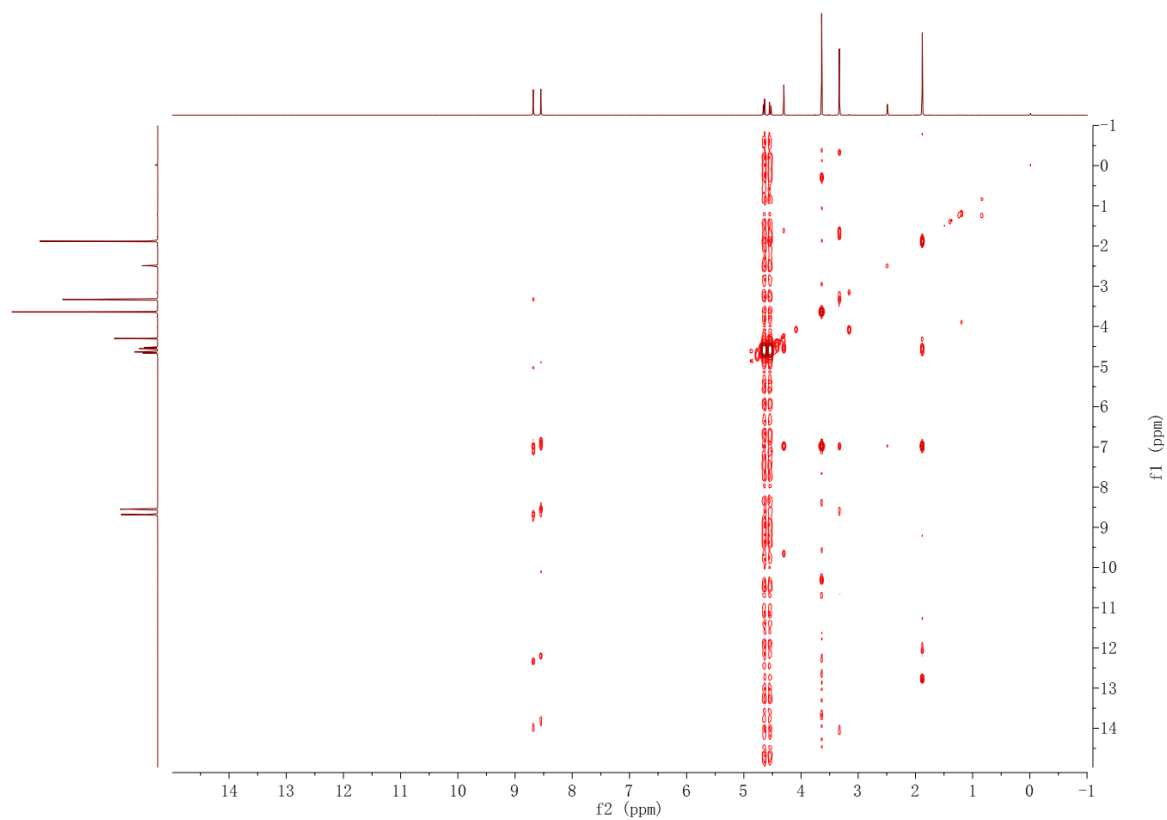

Figure S27. The ROESY spectrum of compound **3** in DMSO-*d*<sub>6</sub>

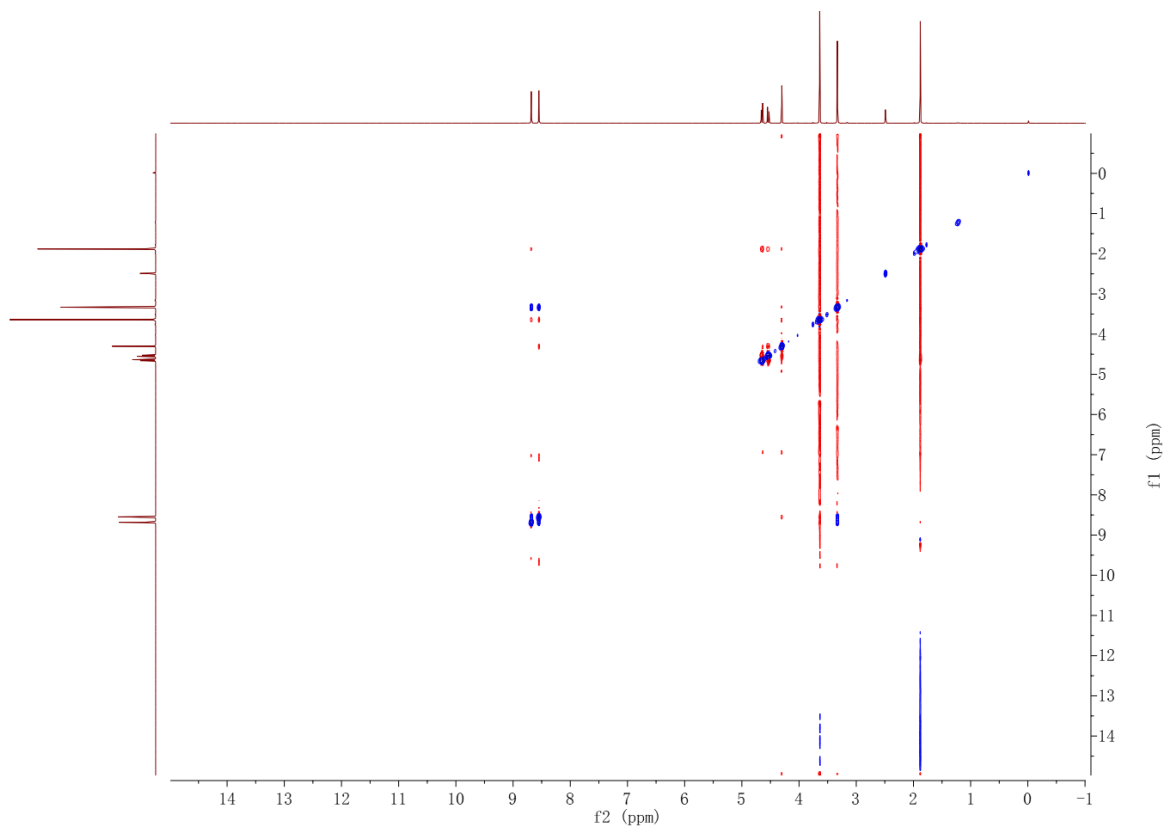

Figure S28. The HRESIMS spectrum of compound **3**

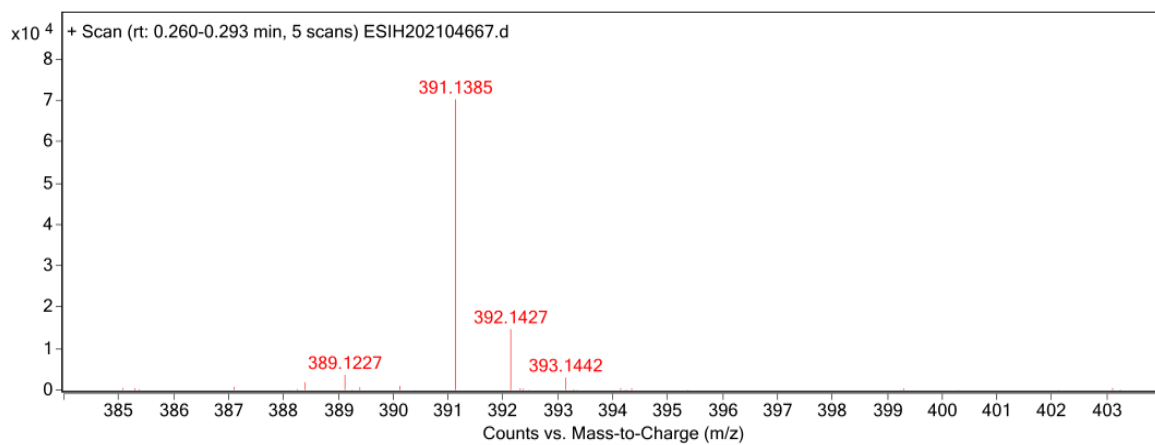

**Formula Calculator Results**

| m/z      | Calc m/z | Diff (mDa) | Diff (ppm) | Ion Formula                                    | Ion                |
|----------|----------|------------|------------|------------------------------------------------|--------------------|
| 391.1385 | 391.1387 | 0.29       | 0.73       | C <sub>20</sub> H <sub>23</sub> O <sub>8</sub> | (M+H) <sup>+</sup> |



Figure S29. The UV spectrum of compound **3**

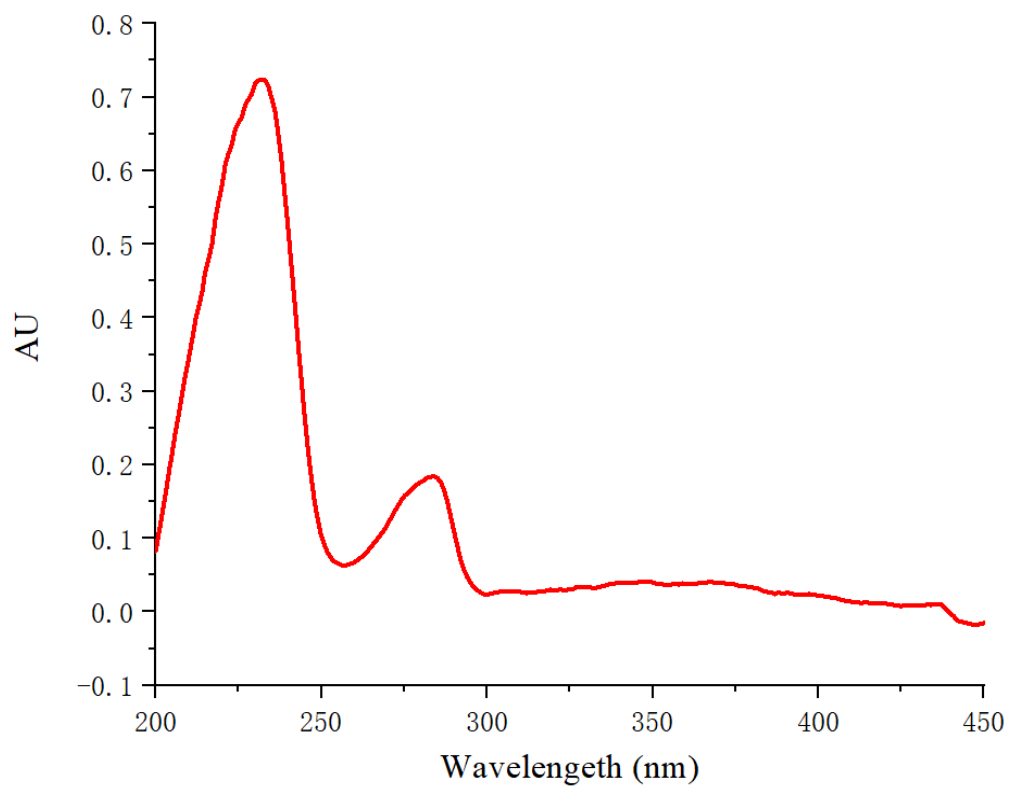

Figure S30. The IR spectrum of compound **3**

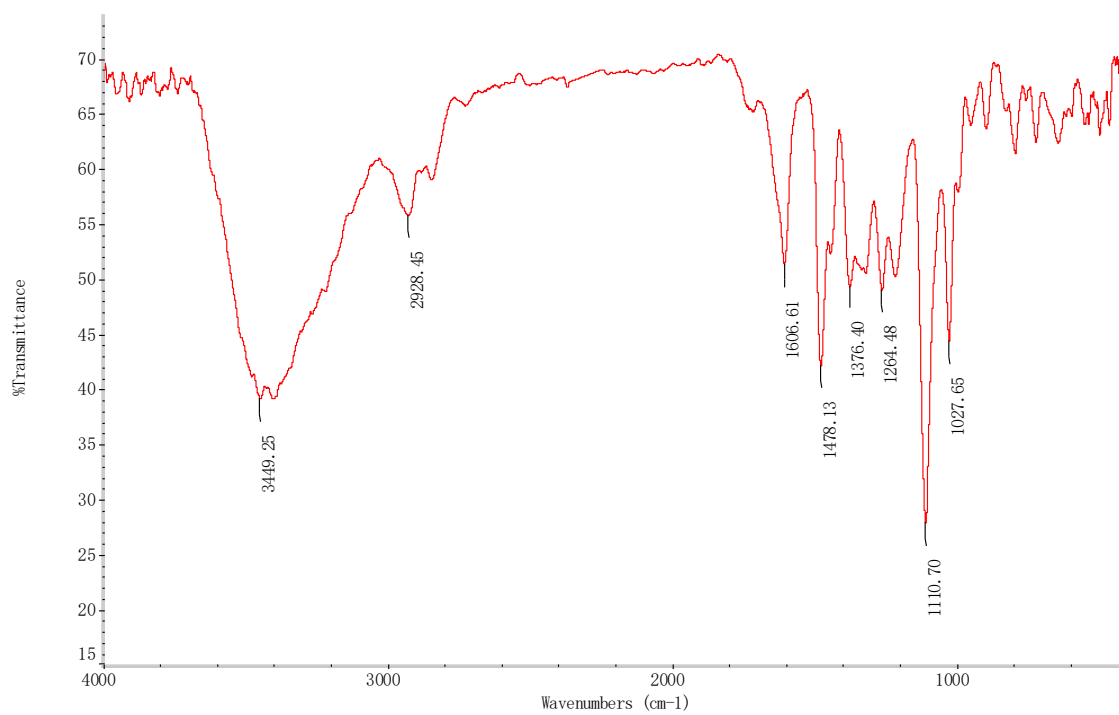

Supplement: s1 [file s1]
